# Supplementary material
Source: PubMed Central journal article supplement (PMC6939612)
Supplement: NIHMS1058820-supplement-Appendix.pdf [file NIHMS1058820-supplement-Appendix.pdf]

## **Appendix**

Univariate and multivariate regression analysis with 95% confidence intervals of the regression coefficients (included are only coefficients significant at the .05 level of significance)

Table 1

## Age 60–69 (Univariate model)

|                                                | Constant | Age   |
|------------------------------------------------|----------|-------|
| MMSE (Total Score)                             | 33.49    | -0.08 |
| Cat. Fluency: Vegetables (Total in 60 seconds) | 27.52    | -0.20 |
| Trail Making: A (Time in seconds)              | -59.79   | 1.64  |
| Trail Making: B (Time in seconds)              | -136.88  | 3.85  |

## Education (Univariate model)

|                                                 | Constant | Education |
|-------------------------------------------------|----------|-----------|
| Logical Memory A Immediate (Total Units)        | 9.55     | 2.10      |
| Logical Memory A Delayed (Total Units)          | 8.61     | 1.98      |
| Digit Span-Forward (Total Trials)               | 8.44     | 1.26      |
| Digit Span-Forward (Longest Sequence)           | 5.75     | 0.64      |
| Digit Span-Backward (Total Trials)              | 5.51     | 1.15      |
| Digit Span-Backward (Longest Sequence)          | 4.23     | 0.59      |
| Cat. Fluency: Animals (Total in 60 seconds)     | 21.13    | 3.20      |
| Trail Making: A (Time in seconds)               | 50.15    | -8.24     |
| Trail Making: B (Time in seconds)               | 124.13   | -24.75    |
| WAIS-R Digit Symbol (Total Items in 90 seconds) | 37.75    | 6.70      |
| Boston Naming Test (Total Score)                | 28.54    | 0.82      |

## Gender (Univariate model)

|                                                | Constant | Gender |
|------------------------------------------------|----------|--------|
| Cat. Fluency: Vegetables (Total in 60 seconds) | 15.61    | -2.50  |

## Age, Education, Gender (Multivariate model)

|  |  |  |
|--|--|--|
|  |  |  |
|--|--|--|

|                                                 | Constant | Gender | Age   | Education |
|-------------------------------------------------|----------|--------|-------|-----------|
| Logical Memory A Immediate (Total Units)        | 9.55     |        |       | 2.10      |
| Logical Memory A Delayed (Total Units)          | 8.61     |        |       | 1.98      |
| Digit Span-Forward (Total Trials)               | 8.44     |        |       | 1.26      |
| Digit Span-Forward (Longest Sequence)           | 5.75     |        |       | 0.64      |
| Digit Span-Backward (Total Trials)              | 5.51     |        |       | 1.15      |
| Digit Span-Backward (Longest Sequence)          | 9.00     |        | -0.07 | 0.63      |
| Cat. Fluency: Animals (Total in 60 seconds)     | 21.13    |        |       | 3.20      |
| Cat. Fluency: Vegetables (Total in 60 seconds)  | 29.06    | -2.51  | -0.21 |           |
| Trail Making: A (Time in seconds)               | -63.02   |        | 1.76  | -9.08     |
| Trail Making: B (Time in seconds)               | -146.42  |        | 4.22  | -26.76    |
| WAIS-R Digit Symbol (Total Items in 90 seconds) | 80.40    | -3.22  | -0.64 | 7.03      |
| Boston Naming Test (Total Score)                | 28.54    |        |       | 0.82      |

Table 2

## Age 70–79 (Univariate model)

|                                                 | Constant | Age   |
|-------------------------------------------------|----------|-------|
| Trail Making: A (Time in seconds)               | -38.55   | 1.24  |
| Trail Making: B (Time in seconds)               | -155.31  | 3.89  |
| WAIS-R Digit Symbol (Total Items in 90 seconds) | 89.23    | -0.72 |

## Education (Univariate model)

|                                                 | Constant | Education |
|-------------------------------------------------|----------|-----------|
| MMSE: Orientation (Total Score)                 | 9.55     | 0.21      |
| MMSE (Total Score)                              | 27.04    | 1.05      |
| Logical Memory A Immediate (Total Units)        | 8.51     | 1.94      |
| Logical Memory A Delayed (Total Units)          | 7.42     | 1.94      |
| Digit Span-Forward (Total Trials)               | 8.08     | 0.70      |
| Digit Span-Forward (Longest Sequence)           | 5.48     | 0.44      |
| Digit Span-Backward (Total Trials)              | 5.08     | 0.69      |
| Cat. Fluency: Animals (Total in 60 seconds)     | 19.10    | 2.72      |
| Trail Making: A (Time in seconds)               | 60.58    | -11.92    |
| Trail Making: B (Time in seconds)               | 151.03   | -31.09    |
| WAIS-R Digit Symbol (Total Items in 90 seconds) | 31.75    | 6.73      |
| Boston Naming Test (Total Score)                | 28.10    | 0.88      |

## Gender (Univariate model)

|                                                | Constant | Gender |
|------------------------------------------------|----------|--------|
| MMSE (Total Score)                             | 27.91    | -0.63  |
| Digit Span - Forward (Total Trials)            | 8.77     | -0.69  |
| Cat. Fluency: Vegetables (Total in 60 seconds) | 14.32    | -1.73  |

|                                                 |       |       |
|-------------------------------------------------|-------|-------|
| Trail Making: A (Time in seconds)               | 50.34 | 8.13  |
| WAIS-R Digit Symbol (Total Items in 90 seconds) | 37.16 | -3.73 |
| Boston Naming Test (Total Score)                | 28.31 | 0.68  |

---

Age, Education, Gender (Multivariate model)

|                                                 | Constant | Gender | Age   | Education |
|-------------------------------------------------|----------|--------|-------|-----------|
| MMSE (Total Score)                              | 27.32    | -0.74  |       | 1.13      |
| Logical Memory A Immediate (Total Units)        | 8.51     |        |       | 1.94      |
| Logical Memory A Delayed (Total Units)          | 7.42     |        |       | 1.94      |
| Digit Span-Forward (Total Trials)               | 8.37     | -0.77  |       | 0.78      |
| Digit Span-Forward (Longest Sequence)           | 5.48     |        |       | 0.44      |
| Cat. Fluency: Animals (Total in 60 seconds)     | 19.10    |        |       | 2.72      |
| Cat. Fluency: Vegetables (Total in 60 seconds)  | 14.32    | -1.73  |       |           |
| Trail Making: A (Time in seconds)               | -39.10   | 9.41   | 1.30  | -13.03    |
| Trail Making: B (Time in seconds)               | -153.99  |        | 4.12  | -32.05    |
| WAIS-R Digit Symbol (Total Items in 90 seconds) | 89.22    | -4.45  | -0.75 | 7.27      |
| Boston Naming Test (Total Score)                | 27.88    | 0.60   |       | 0.82      |

---

Table 3

## Age 80+ (Univariate model)

|                                     | Constant | Age   |
|-------------------------------------|----------|-------|
| MMSE (Total Score)                  | 33.40    | -0.08 |
| Digit Span - Forward (Total Trials) | 14.49    | -0.08 |
| Trail Making: A (Time in seconds)   | -156.66  | 2.68  |
| Trail Making: B (Time in seconds)   | -170.37  | 4.03  |

## Education (Univariate model)

|                                                 | Constant | Education |
|-------------------------------------------------|----------|-----------|
| MMSE (Total Score)                              | 26.35    | 0.87      |
| Logical Memory A Immediate (Total Units)        | 8.17     | 1.98      |
| Logical Memory A Delayed (Total Units)          | 6.78     | 1.79      |
| Digit Span-Forward (Total Trials)               | 7.73     | 0.60      |
| Digit Span-Forward (Longest Sequence)           | 5.27     | 0.50      |
| Digit Span-Backward (Total Trials)              | 4.88     | 0.44      |
| Cat. Fluency: Animals (Total in 60 seconds)     | 16.68    | 2.50      |
| Trail Making: A (Time in seconds)               | 78.22    | -12.16    |
| Trail Making: B (Time in seconds)               | 189.42   | -31.47    |
| WAIS-R Digit Symbol (Total Items in 90 seconds) | 26.79    | 6.06      |
| Boston Naming Test (Total Score)                | 27.70    | 1.06      |

## Gender (Univariate model)

|                                      | Constant | Gender |
|--------------------------------------|----------|--------|
| MMSE: Orientation (Total Score)      | 8.51     | 1.57   |
| MMSE (Total Score)                   | 7.20     | 1.16   |
| Digit Span - Backward (Total Trials) | 4.92     | 0.44   |

|                                                 |       |      |
|-------------------------------------------------|-------|------|
| WAIS-R Digit Symbol (Total Items in 90 seconds) | 28.74 | 2.84 |
| Boston Naming Test (Total Score)                | 27.69 | 1.25 |

---

Age, Education, Gender (Multivariate model)

|                                                 | Constant | Gender | Age   | Education |
|-------------------------------------------------|----------|--------|-------|-----------|
| MMSE (Total Score)                              | 32.57    |        | -0.07 | 0.85      |
| Logical Memory A Immediate (Total Units)        | 7.65     | 1.34   |       | 1.81      |
| Logical Memory A Delayed (Total Units)          | 6.42     | 0.95   |       | 1.67      |
| Digit Span - Forward (Total Trials)             | 13.92    |        | -0.07 | 0.58      |
| Digit Span - Forward (Longest Sequence)         | 5.27     |        |       | 0.50      |
| Cat. Fluency: Animals (Total in 60 seconds)     | 16.68    |        |       | 2.50      |
| Trail Making: A (Time in seconds)               | -145.54  |        | 2.62  | -11.29    |
| Trail Making: B (Time in seconds)               | -140.91  |        | 3.87  | -30.23    |
| WAIS-R Digit Symbol (Total Items in 90 seconds) | 26.79    |        |       | 6.06      |
| Boston Naming Test (Total Score)                | 27.26    | 1.13   |       | 0.92      |

---

*NOTE.* Age = in years; Gender = 0 is woman; 1 is man; Education = 0 is lower, 1 is higher. MMSE: MMSE: Orientation (Total Score); MMSE (Total Score); Logical Memory A Immediate (Total Units); Logical Memory A Delayed (Total Units); Digit Span-Forward (Total Trials); Digit Span-Forward (Longest Sequence); Digit Span-Backward (Total Trials); Digit Span-Backward (Longest Sequence); Category Fluency: Animals (Total in 60 seconds); Category Fluency: Vegetables (Total in 60 seconds); Trail Making Test: A (Time in seconds); Trail Making Test: B (Time in seconds); Digit Symbol (Total Items in 90 seconds); Boston Naming Test, 30 items (Total Score).

Table 4

Main effects of ANOVA (F-values, preceded by corresponding degrees of freedom) performed on all UDS-Cz 2.0 test measures

|                                                | df1,<br>df2 | F-values  |               | Significance level<br>(p) |           |
|------------------------------------------------|-------------|-----------|---------------|---------------------------|-----------|
|                                                |             | Age       | Educatio<br>n | Age                       | Education |
| MMSE: Orientation (Total Score)                | 3, 516      | 19.4<br>7 | 3.86          | ***                       | *         |
| MMSE (Total Score)                             | 3, 516      | 23.9<br>0 | 24.72         | ***                       | ***       |
| Logical Memory A Immediate (Total Units)       | 3, 516      | 7.99      | 43.36         | ***                       | ***       |
| Logical Memory A Delayed (Total Units)         | 3, 516      | 14.8<br>3 | 42.68         | ***                       | ***       |
| Digit Span-Forward (Total Trials)              | 3, 516      | 11.9<br>5 | 21.80         | ***                       | ***       |
| Digit Span-Forward (Longest Sequence)          | 3, 516      | 9.47      | 24.79         | ***                       | ***       |
| Digit Span-Backward (Total Trials)             | 3, 516      | 12.6<br>3 | 19.69         | ***                       | ***       |
| Digit Span-Backward (Longest Sequence)         | 3, 516      | 14.2<br>3 | 13.92         | ***                       | ***       |
| Cat. Fluency: Animals (Total in 60 seconds)    | 3, 516      | 35.1<br>4 | 34.47         | ***                       | ***       |
| Cat. Fluency: Vegetables (Total in 60 seconds) | 3, 511      | 14.1<br>9 | 2.61          | ***                       |           |
| Trail Making: A (Time in seconds)              | 3, 516      | 47.7<br>3 | 23.44         | ***                       | ***       |

|                                                 |        |           |       |     |     |
|-------------------------------------------------|--------|-----------|-------|-----|-----|
| Trail Making: B (Time in seconds)               | 3, 510 | 51.7<br>1 | 33.39 | *** | *** |
| WAIS-R Digit Symbol (Total Items in 90 seconds) | 3, 515 | 76.9<br>1 | 75.16 | *** | *** |
| Boston Naming Test (Total Score)                | 3, 516 | 6.62      | 34.51 | *   | *** |

---

*NOTE.* df = degree of freedom; \* p<.05; \*\*p<.01; \*\*\*p<.001. Asterisk in bold = still significant after Bonferroni correction for 14 comparisons.
